# Supplementary material for: Deterministic splitting of fluid volumes in electrowetting microfluidics
Source: Royal Society of Chemistry journal article supplement (doi:10.1039/c2lc40723j), 2012-01-01
Supplement: c2lc40723j.pdf [file c2lc40723j.pdf]

## Derivation of the cross-sectional area of the virtual channel

Cross-section of the virtual channel can be divided into a trapezoid and two segments, one on each side. The width of the channel at the top  $w_t$  changes with bulging and can be expressed as a function of the sidewall radius of curvature  $R_s$  and the bottom contact angle  $\theta_s$ . This is illustrated in Fig. A1.

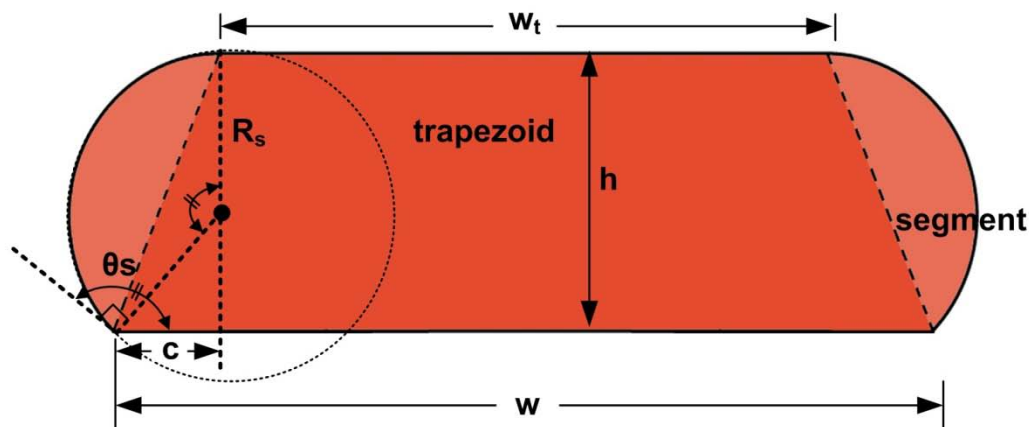

**Fig. A1:** Cross-section of the virtual channel.

The total cross-sectional area  $A$  is given then by

$$A = A_T + 2A_S \quad (\text{A1})$$

where  $A_T$  is the trapezoid area and  $A_S$  is the segment area.

The area of a trapezoid is defined as

$$A_T = h(w_t + w)/2 \quad (\text{A2})$$

The width at the top is defined as

$$w_t = w - 2c \quad (\text{A3})$$

where  $c = R_s \sin \theta_s$ . Substituting A3 into A2 and simplifying leads to the trapezoid area

$$A_T = h(w - R_s \sin \theta_s) \quad (\text{A4})$$

The area of a circular segment is defined as

$$A_S = \frac{R_s^2}{2} \left( \frac{\theta_s \pi}{180} - \sin \theta_s \right) \quad (\text{A5})$$

Substituting A4 and A5 into A1 yields the cross-sectional area of a virtual channel as:

$$\begin{aligned} A &= h(w - R_s \sin \theta_s) + \frac{R_s^2}{2} \left( \frac{\theta_s \pi}{180} - \sin \theta_s \right) \\ &= hw - R_s \sin \theta_s (h + R_s) + \frac{\theta_s}{180} \pi R_s^2 \end{aligned} \quad (\text{A6})$$
